# Supplementary material for: Mononuclear complexes and a coordination polymer of the 2-pyridylamino (NH2Py) functionalized P(v) ligand
Source: Royal Society of Chemistry journal article supplement (doi:10.1039/c4ra02258k), 2014-01-01
Supplement: c4ra02258k1.pdf [file c4ra02258k1.pdf]

## Electronic Supplementary Information

### Mononuclear Complexes and Coordination Polymer of 2-Pyridylamino (NH<sup>2</sup>Py) Functionalized P(V) Ligand

Souvik Pal,<sup>a</sup> Partha P. Jana,<sup>b</sup> and Hari Pada Nayek<sup>\*a</sup>

<sup>a</sup>Department of Applied Chemistry, Indian School of Mines, Dhanbad-826004, Jharkhand, India

<sup>b</sup>CAS Chemical Centre, Lund University, Getingeaven 60, Box 124, SE-22100 Lund, Sweden

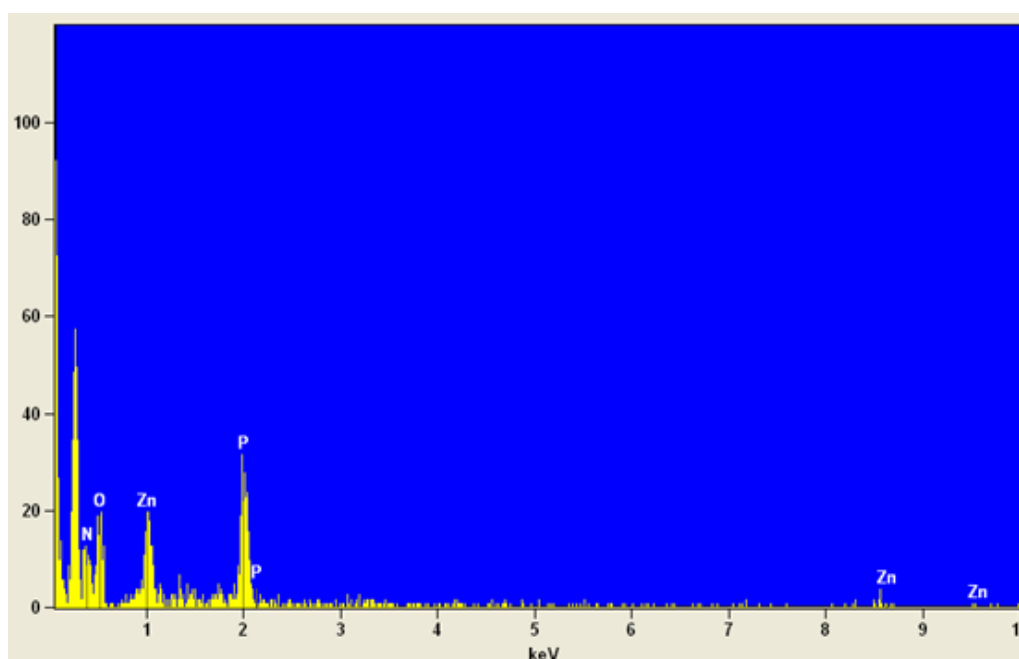

**Figure S1:**EDX spectrum of 1.

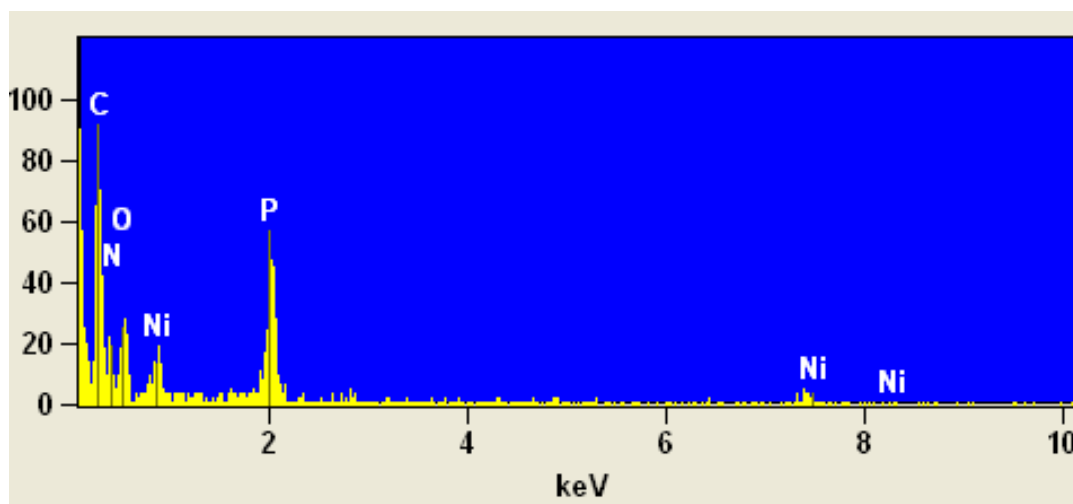

*Figure S2:EDX spectrum of 2.*

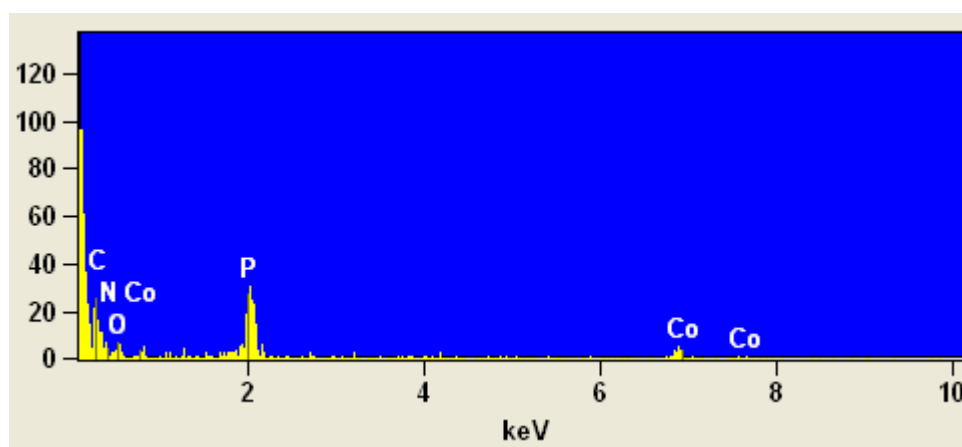

*Figure S3:EDX spectrum of 3.*

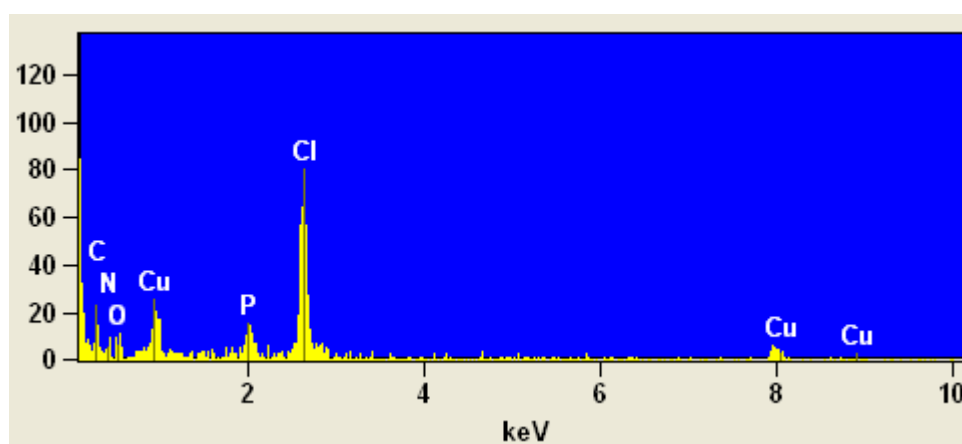

*Figure S4:EDX spectrum of 4.*

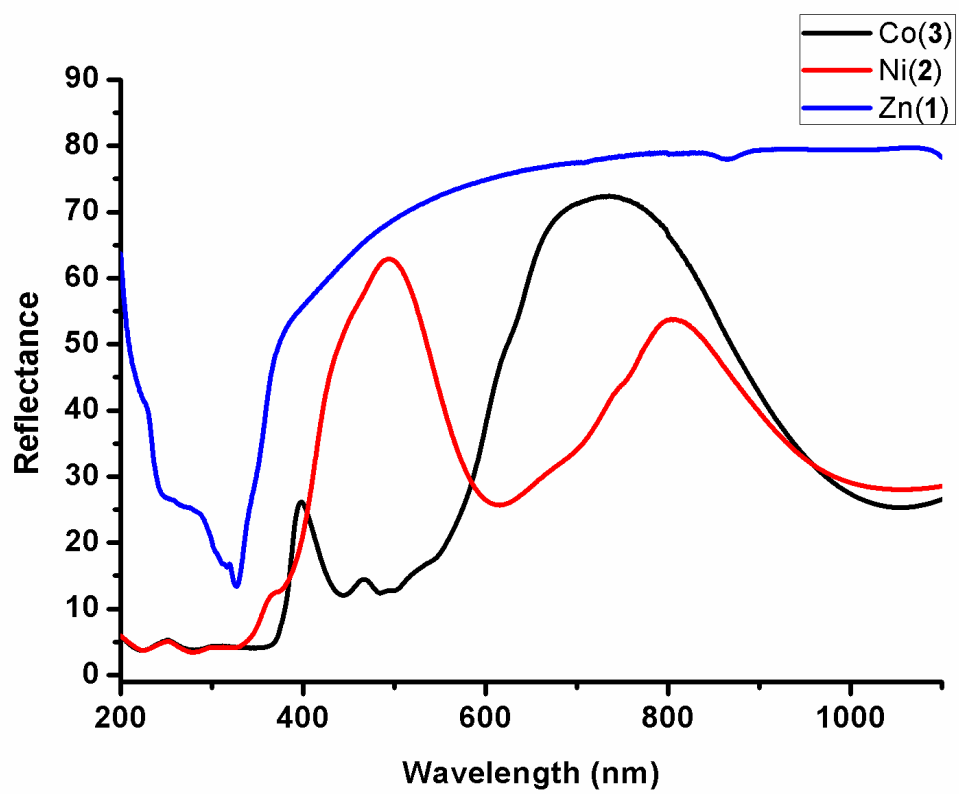

*Figure S5: Solid state diffuse reflectance spectra of 1-3.*
